# Supplementary material for: Leucine rich amelogenin peptide prevents ovariectomy-induced bone loss in mice
Source: PubMed Central journal article supplement (PMC8592471; doi:10.1371/journal.pone.0259966), 2021-11-15
Supplement: pone.0259966.s005.pdf [file pone.0259966.s005.pdf]

**S1 Table***Sequences for target gene primers*

| <i>PRIMER</i>         | <i>SEQUENCES</i>               | <i>GenBank accession</i> |
|-----------------------|--------------------------------|--------------------------|
| <i>Amelx</i> (F)      | 5-AATGGGGACCTGGATTTTGTG-3      | NM_009666                |
| <i>Amelx</i> (R)      | 5-TCCCGCTTGGTCTTGTCTGTGCTGCT-3 |                          |
| <i>Genotyping</i> (F) | 5-GGATTTGTGTTGCCTGCCTCC-3      | NM_009666                |
| <i>Genotyping</i> (R) | 5-CACTTCTTCCCGCTTGGTCTTG-3     |                          |
| <i>IRES-EGFP</i> (F)  | 5-CCACCATATTGCCGTCCTTTG-3      | -                        |
| <i>IRES-EGFP</i> (R)  | 5-CCACAACACTCAACTCACAAC-3      |                          |
| <i>Gapdh</i> (F)      | 5-CCATCACCATCTTCCAGGAG-3       | NM_001001303             |
| <i>Gapdh</i> (R)      | 5-GCATGTgLRAPGACTGTGGTCATGAG-3 |                          |
| <i>Oc</i> (F)         | 5-CTGACCTCACAGATCCCAAGC-3      | NM_031368                |
| <i>Oc</i> (R)         | 5-TGGTCTGATAGCTCGTCACAAG-3     |                          |
| <i>Opg</i> (F)        | 5-ACCCAGAAACTGGTCATCAGC-3      | NM_008764                |
| <i>Opg</i> (R)        | 5-CTGCAATACACACTCATCACT-3      |                          |
| <i>Alp</i> (F)        | 5-CCAACCTTTTTGTGCCAGAGA-3      | NM_007431                |
| <i>Alp</i> (R)        | 5-GGCTACATTGGTGTGAGCTTTT-3     |                          |
| <i>Opn</i> (F)        | 5-AGCAAGAAACTCTTCCAAGCAA-3     | NM_009263                |
| <i>Opn</i> (R)        | 5-GTGAGATTCGTCAGATTCATCCG-3    |                          |
| <i>Rankl</i> (F)      | 5-CAGCATCGCTCTGTTCCTGTA-3      | NM_011613                |
| <i>Rankl</i> (R)      | 5-CTGCGTTTTCATGGAGTCTCA-3      |                          |
| <i>Runx2</i> (F)      | 5-CCAACCGAGTCATTTAAGGCT-3      | NM_009820                |
| <i>Runx2</i> (R)      | 5-GCTCACGTCGCTCATCTTG-3        |                          |
| <i>Mmp13</i> (F)      | 5-CTTCTTCTTGTTGAGCTGGACTC-3    | NM_008607                |
| <i>Mmp13</i> (R)      | 5-CTGTGGAGGTCAGTGTAGACT-3      |                          |
| <i>Hprt</i> (F)       | 5-TCAGTCAACGGGGGACATAAA-3      | NM_013556                |
| <i>Hprt</i> (R)       | 5-GGGGCTGTACTGCTTAACCAG-3      |                          |
| <i>Bsp</i> (F)        | 5-CAGGGAGGCAGTGACTCTTC-3       | NM_008318                |
| <i>Bsp</i> (R)        | 5-AGTGTGAAAGTGTGGCGTT-3        |                          |
